# Supplementary material
Source: HighWire-hosted journal article supplement (https://ijgc.bmj.com/highwire/filestream/18158/field_highwire_adjunct_files/0/ijgc-2020-001718supp001_data_supplement.pdf)

**Table 1. Fagotti Laparoscopic Scoring Algorithm**

| Tumor Characteristic                                                                                                                                   | Score                          |
|--------------------------------------------------------------------------------------------------------------------------------------------------------|--------------------------------|
| Peritoneal carcinomatosis:<br>Massive peritoneal involvement and/or miliary pattern of distribution                                                    | 0 (not present) or 2 (present) |
| Diaphragmatic surface involvement:<br>Widespread infiltrating carcinomatosis and/or confluent nodules to most of diaphragm surface                     | 0 (not present) or 2 (present) |
| Mesenteric involvement:<br>Large infiltrating nodules and/or involvement of the root of the mesentery based on limited movement of intestinal segments | 0 (not present) or 2 (present) |
| Omental involvement:<br>Tumor diffusion of the omentum up to the greater curvature of the stomach                                                      | 0 (not present) or 2 (present) |
| Bowel involvement:<br>Tumor infiltration of large or small bowel requiring intestinal resection (excludes rectosigmoid colon) and/or                   | 0 (not present) or 2 (present) |
| Stomach involvement:<br>Obvious tumor infiltration into gastric wall                                                                                   | 0 (not present) or 2 (present) |
| Liver involvement:<br>Liver surface lesions >2 cm in size                                                                                              | 0 (not present) or 2 (present) |

**Table 2. Consort diagram**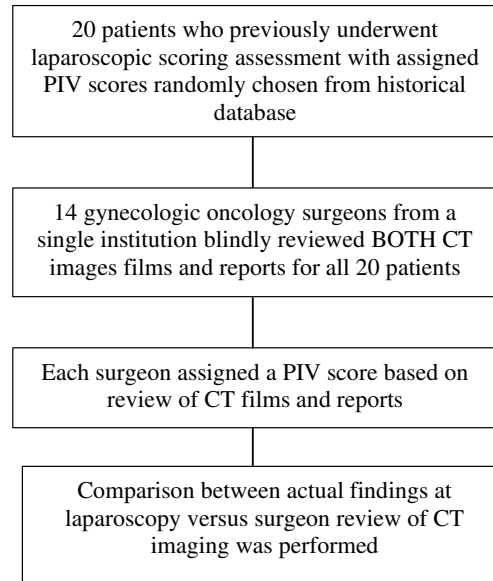

**Table 3. Summary statistics of surgeon scores based on agreement (PIV  $\geq$  8 or PIV <8)**

| Characteristic      | Did not agree |    | Agree |    |
|---------------------|---------------|----|-------|----|
|                     | N             | %  | N     | %  |
| Title:              |               |    |       |    |
| ASSISTANT PROFESSOR | 59            | 49 | 61    | 51 |
| ASSOCIATE PROFESSOR | 12            | 30 | 28    | 70 |
| PROFESSOR           | 53            | 44 | 67    | 56 |
| Surgeon Name        |               |    |       |    |
| 1                   | 5             | 25 | 15    | 75 |
| 2                   | 7             | 35 | 13    | 65 |
| 3                   | 11            | 55 | 9     | 45 |
| 4                   | 8             | 40 | 12    | 60 |
| 5                   | 13            | 65 | 7     | 35 |
| 6                   | 13            | 65 | 7     | 35 |
| 7                   | 8             | 40 | 12    | 60 |
| 8                   | 8             | 40 | 12    | 60 |
| 9                   | 8             | 40 | 12    | 60 |
| 10                  | 7             | 35 | 13    | 65 |
| 11                  | 10            | 50 | 10    | 50 |
| 12                  | 8             | 40 | 12    | 60 |
| 13                  | 6             | 30 | 14    | 70 |
| 14                  | 12            | 60 | 8     | 40 |

**Table 4a: GLMs to estimate probability of agreement between subscales**

| <b>Subscale</b> | <b>Pr(agreement)</b> | <b>95%LB</b> | <b>95% UB</b> |
|-----------------|----------------------|--------------|---------------|
| Peritoneal      | 0.566                | 0.507        | 0.623         |
| Diaphragm       | 0.538                | 0.477        | 0.597         |
| Mesenteric      | 0.511                | 0.452        | 0.569         |
| Omental         | 0.612                | 0.548        | 0.672         |
| Bowel           | 0.539                | 0.440        | 0.636         |
| Stomach         | 0.711                | 0.653        | 0.762         |
| Liver           | 0.361                | 0.305        | 0.420         |

GLM=general linear model

**Table 4b: Kappa inter-rater agreement statistics on radiology summary scores**

| <b>Subscale</b> | <b>Kappa</b> | <b>95%LB</b> | <b>95% UB</b> |
|-----------------|--------------|--------------|---------------|
| Total Score     | -0.017       | -0.023       | -0.005        |
| Peritoneal      | 0.233        | 0.121        | 0.391         |
| Diaphragm       | 0.039        | -0.016       | 0.103         |
| Mesenteric      | 0.056        | 0.009        | 0.133         |
| Omental         | 0.098        | 0.030        | 0.193         |
| Bowel           | 0.081        | 0.016        | 0.200         |
| Stomach         | 0.115        | -0.016       | 0.217         |
| Liver           | -0.003       | -0.025       | 0.037         |

**Table 5a. Surgeon 1 Scoring Data**

| Patient ID | Surgeon Score | Surgeon Triage | Actual Lap Score | Actual Lap Triage |
|------------|---------------|----------------|------------------|-------------------|
| 1          | 4             | Primary        | 6                | NACT              |
| 2          | 4             | Primary        | 14               | NACT              |
| 3          | 6             | Primary        | 6                | NACT              |
| 4          | 8             | NACT           | 10               | NACT              |
| 5          | 4             | Primary        | 2                | Primary           |
| 6          | 2             | Primary        | 14               | NACT              |
| 7          | 6             | Primary        | 10               | NACT              |
| 8          | 6             | Primary        | 8                | NACT              |
| 9          | 6             | Primary        | 4                | Primary           |
| 10         | 10            | NACT           | 8                | NACT              |
| 11         | 4             | Primary        | 10               | NACT              |
| 12         | 2             | Primary        | 4                | Primary           |
| 13         | 6             | Primary        | 14               | NACT              |
| 14         | 0             | Primary        | 2                | Primary           |
| 15         | 10            | NACT           | 10               | NACT              |
| 16         | 6             | Primary        | 8                | NACT              |
| 17         | 8             | NACT           | 12               | NACT              |
| 18         | 0             | Primary        | 0                | Primary           |
| 19         | 8             | NACT           | 12               | NACT              |
| 20         | 10            | NACT           | 10               | NACT              |

Surgeon 1 percentage agreement: 55%; Surgeon 1 projected futile laparotomy rate: 45%

**Table 5b. Surgeon 2 Scoring Data**

| Patient ID | Surgeon Score | Surgeon Triage | Actual Lap Score | Actual Lap Triage |
|------------|---------------|----------------|------------------|-------------------|
| 1          | 2             | Primary        | 6                | NACT              |
| 2          | 4             | Primary        | 14               | NACT              |
| 3          | 8             | NACT           | 6                | NACT              |
| 4          | 2             | Primary        | 10               | NACT              |
| 5          | 10            | NACT           | 2                | Primary           |
| 6          | 6             | Primary        | 14               | NACT              |
| 7          | 8             | NACT           | 10               | NACT              |
| 8          | 6             | Primary        | 8                | NACT              |
| 9          | 8             | NACT           | 4                | Primary           |
| 10         | 6             | Primary        | 8                | NACT              |
| 11         | 4             | Primary        | 10               | NACT              |
| 12         | 4             | Primary        | 4                | Primary           |
| 13         | 8             | NACT           | 14               | NACT              |
| 14         | 6             | Primary        | 2                | Primary           |
| 15         | 2             | Primary        | 10               | NACT              |
| 16         | 4             | Primary        | 8                | NACT              |
| 17         | 8             | NACT           | 12               | NACT              |
| 18         | 2             | Primary        | 0                | Primary           |
| 19         | 2             | Primary        | 12               | NACT              |
| 20         | 0             | Primary        | 10               | NACT              |

Surgeon 2 percentage agreement: 35%; Surgeon 2 projected futile laparotomy rate: 55%

**Table 5c. Surgeon 3 Scoring Data**

| Patient ID | Surgeon Score | Surgeon Triage | Actual Lap Score | Actual Lap Triage |
|------------|---------------|----------------|------------------|-------------------|
| 1          | 4             | Primary        | 6                | NACT              |

|    |    |         |    |         |
|----|----|---------|----|---------|
| 2  | 6  | Primary | 14 | NACT    |
| 3  | 8  | NACT    | 6  | NACT    |
| 4  | 10 | NACT    | 10 | NACT    |
| 5  | 8  | NACT    | 2  | Primary |
| 6  | 4  | Primary | 14 | NACT    |
| 7  | 4  | Primary | 10 | NACT    |
| 8  | 10 | NACT    | 8  | NACT    |
| 9  | 6  | Primary | 4  | Primary |
| 10 | 8  | NACT    | 8  | NACT    |
| 11 | 6  | Primary | 10 | NACT    |
| 12 | 4  | Primary | 4  | Primary |
| 13 | 6  | Primary | 14 | NACT    |
| 14 | 2  | Primary | 2  | Primary |
| 15 | 10 | NACT    | 10 | NACT    |
| 16 | 8  | NACT    | 8  | NACT    |
| 17 | 8  | NACT    | 12 | NACT    |
| 18 | 2  | Primary | 0  | Primary |
| 19 | 8  | NACT    | 12 | NACT    |
| 20 | 2  | Primary | 10 | NACT    |

Surgeon 3 percentage agreement: 60%; Surgeon 3 projected futile laparotomy rate: 35%

**Table 5d. Surgeon 4 Scoring Data**

| Patient ID | Surgeon Score | Surgeon Triage | Actual Lap Score | Actual Lap Triage |
|------------|---------------|----------------|------------------|-------------------|
| 1          | 2             | Primary        | 6                | NACT              |
| 2          | 6             | Primary        | 14               | NACT              |
| 3          | 4             | Primary        | 6                | NACT              |
| 4          | 6             | Primary        | 10               | NACT              |
| 5          | 8             | NACT           | 2                | Primary           |
| 6          | 10            | NACT           | 14               | NACT              |
| 7          | 8             | NACT           | 10               | NACT              |
| 8          | 0             | Primary        | 8                | NACT              |
| 9          | 4             | Primary        | 4                | Primary           |
| 10         | 8             | NACT           | 8                | NACT              |
| 11         | 6             | Primary        | 10               | NACT              |
| 12         | 2             | Primary        | 4                | Primary           |
| 13         | 8             | NACT           | 14               | NACT              |
| 14         | 2             | Primary        | 2                | Primary           |
| 15         | 10            | NACT           | 10               | NACT              |
| 16         | 8             | NACT           | 8                | NACT              |
| 17         | 8             | NACT           | 12               | NACT              |
| 18         | 2             | Primary        | 0                | Primary           |
| 19         | 6             | Primary        | 12               | NACT              |
| 20         | 8             | NACT           | 10               | NACT              |

Surgeon 4 percentage agreement: 60%; Surgeon 4 projected futile laparotomy rate: 35%

**Table 5e. Surgeon 5 Scoring Data**

| Patient ID | Surgeon Score | Surgeon Triage | Actual Lap Score | Actual Lap Triage |
|------------|---------------|----------------|------------------|-------------------|
| 1          | 10            | NACT           | 6                | NACT              |
| 2          | 8             | NACT           | 14               | NACT              |
| 3          | 2             | Primary        | 6                | NACT              |
| 4          | 8             | NACT           | 10               | NACT              |
| 5          | 12            | NACT           | 2                | Primary           |

|    |    |         |    |         |
|----|----|---------|----|---------|
| 6  | 8  | NACT    | 14 | NACT    |
| 7  | 10 | NACT    | 10 | NACT    |
| 8  | 6  | Primary | 8  | NACT    |
| 9  | 0  | Primary | 4  | Primary |
| 10 | 8  | NACT    | 8  | NACT    |
| 11 | 8  | NACT    | 10 | NACT    |
| 12 | 2  | Primary | 4  | Primary |
| 13 | 10 | NACT    | 14 | NACT    |
| 14 | 4  | Primary | 2  | Primary |
| 15 | 12 | NACT    | 10 | NACT    |
| 16 | 6  | Primary | 8  | NACT    |
| 17 | 2  | Primary | 12 | NACT    |
| 18 | 2  | Primary | 0  | Primary |
| 19 | 4  | Primary | 12 | NACT    |
| 20 | 6  | Primary | 10 | NACT    |

Surgeon 5 percentage agreement: 65%; Surgeon 5 projected futile laparotomy rate: 30%

**Table 5f. Surgeon 6 Scoring Data**

| Patient ID | Surgeon Score | Surgeon Triage | Actual Lap Score | Lap Triage |
|------------|---------------|----------------|------------------|------------|
| 1          | 6             | Primary        | 6                | NACT       |
| 2          | 8             | NACT           | 14               | NACT       |
| 3          | 4             | Primary        | 6                | NACT       |
| 4          | 6             | Primary        | 10               | NACT       |
| 5          | 10            | NACT           | 2                | Primary    |
| 6          | 2             | Primary        | 14               | NACT       |
| 7          | 2             | Primary        | 10               | NACT       |
| 8          | 0             | Primary        | 8                | NACT       |
| 9          | 0             | Primary        | 4                | Primary    |
| 10         | 4             | Primary        | 8                | NACT       |
| 11         | 4             | Primary        | 10               | NACT       |
| 12         | 2             | Primary        | 4                | Primary    |
| 13         | 2             | Primary        | 14               | NACT       |
| 14         | 0             | Primary        | 2                | Primary    |
| 15         | 0             | Primary        | 10               | NACT       |
| 16         | 6             | Primary        | 8                | NACT       |
| 17         | 6             | Primary        | 12               | NACT       |
| 18         | 2             | Primary        | 0                | Primary    |
| 19         | 2             | Primary        | 12               | NACT       |
| 20         | 6             | Primary        | 10               | NACT       |

Surgeon 6 percentage agreement: 25%; Surgeon 6 projected futile laparotomy rate: 70%

**Table 5g. Surgeon 7 Scoring Data**

| Patient ID | Surgeon Score | Surgeon Triage | Actual Lap Score | Lap Triage |
|------------|---------------|----------------|------------------|------------|
| 1          | 4             | Primary        | 6                | NACT       |
| 2          | 2             | Primary        | 14               | NACT       |
| 3          | 10            | NACT           | 6                | NACT       |
| 4          | 8             | NACT           | 10               | NACT       |
| 5          | 6             | Primary        | 2                | Primary    |
| 6          | 8             | NACT           | 14               | NACT       |
| 7          | 6             | Primary        | 10               | NACT       |
| 8          | 10            | NACT           | 8                | NACT       |
| 9          | 8             | NACT           | 4                | Primary    |

|    |    |         |    |         |
|----|----|---------|----|---------|
| 10 | 10 | NACT    | 8  | NACT    |
| 11 | 6  | Primary | 10 | NACT    |
| 12 | 6  | Primary | 4  | Primary |
| 13 | 6  | Primary | 14 | NACT    |
| 14 | 4  | Primary | 2  | Primary |
| 15 | 10 | NACT    | 10 | NACT    |
| 16 | 8  | NACT    | 8  | NACT    |
| 17 | 12 | NACT    | 12 | NACT    |
| 18 | 2  | Primary | 0  | Primary |
| 19 | 4  | Primary | 12 | NACT    |
| 20 | 6  | Primary | 10 | NACT    |

Surgeon 7 percentage agreement: 60%; Surgeon 7 projected futile laparotomy rate: 35%

**Table 5h. Surgeon 8 Scoring Data**

| Patient ID | Surgeon Score | Surgeon Triage | Actual Lap Score | Lap Triage |
|------------|---------------|----------------|------------------|------------|
| 1          | 4             | Primary        | 6                | NACT       |
| 2          | 0             | Primary        | 14               | NACT       |
| 3          | 10            | NACT           | 6                | NACT       |
| 4          | 8             | NACT           | 10               | NACT       |
| 5          | 6             | Primary        | 2                | Primary    |
| 6          | 4             | Primary        | 14               | NACT       |
| 7          | 2             | Primary        | 10               | NACT       |
| 8          | 6             | Primary        | 8                | NACT       |
| 9          | 4             | Primary        | 4                | Primary    |
| 10         | 6             | Primary        | 8                | NACT       |
| 11         | 4             | Primary        | 10               | NACT       |
| 12         | 2             | Primary        | 4                | Primary    |
| 13         | 8             | NACT           | 14               | NACT       |
| 14         | 4             | Primary        | 2                | Primary    |
| 15         | 10            | NACT           | 10               | NACT       |
| 16         | 6             | Primary        | 8                | NACT       |
| 17         | 10            | NACT           | 12               | NACT       |
| 18         | 0             | Primary        | 0                | Primary    |
| 19         | 6             | Primary        | 12               | NACT       |
| 20         | 2             | Primary        | 10               | NACT       |

Surgeon 8 percentage agreement: 50%; Surgeon 8 projected futile laparotomy rate: 50%

**Table 5i. Surgeon 9 Scoring Data**

| Patient ID | Surgeon Score | Surgeon Triage | Actual Lap Score | Lap Triage |
|------------|---------------|----------------|------------------|------------|
| 1          | 6             | Primary        | 6                | NACT       |
| 2          | 4             | Primary        | 14               | NACT       |
| 3          | 8             | NACT           | 6                | NACT       |
| 4          | 10            | NACT           | 10               | NACT       |
| 5          | 10            | NACT           | 2                | Primary    |
| 6          | 8             | NACT           | 14               | NACT       |
| 7          | 8             | NACT           | 10               | NACT       |
| 8          | 6             | Primary        | 8                | NACT       |
| 9          | 2             | Primary        | 4                | Primary    |
| 10         | 10            | NACT           | 8                | NACT       |
| 11         | 6             | Primary        | 10               | NACT       |
| 12         | 4             | Primary        | 4                | Primary    |
| 13         | 8             | NACT           | 14               | NACT       |



|    |    |         |    |         |
|----|----|---------|----|---------|
| 14 | 10 | NACT    | 2  | Primary |
| 15 | 12 | NACT    | 10 | NACT    |
| 16 | 6  | Primary | 8  | NACT    |
| 17 | 10 | NACT    | 12 | NACT    |
| 18 | 4  | Primary | 0  | Primary |
| 19 | 8  | NACT    | 12 | NACT    |
| 20 | 6  | Primary | 10 | NACT    |

Surgeon 9 percentage agreement: 60%; Surgeon 9 projected futile laparotomy rate: 30%

**Table 5j. Surgeon 10 Scoring Data**

| Patient ID | Surgeon Score | Surgeon Triage | Actual Lap Score | Lap Triage |
|------------|---------------|----------------|------------------|------------|
| 1          | 6             | Primary        | 6                | NACT       |
| 2          | 8             | NACT           | 14               | NACT       |
| 3          | 4             | Primary        | 6                | NACT       |
| 4          | 6             | Primary        | 10               | NACT       |
| 5          | 8             | NACT           | 2                | Primary    |
| 6          | 12            | NACT           | 14               | NACT       |
| 7          | 8             | NACT           | 10               | NACT       |
| 8          | 2             | Primary        | 8                | NACT       |
| 9          | 0             | Primary        | 4                | Primary    |
| 10         | 10            | NACT           | 8                | NACT       |
| 11         | 8             | NACT           | 10               | NACT       |
| 12         | 0             | Primary        | 4                | Primary    |
| 13         | 10            | NACT           | 14               | NACT       |
| 14         | 4             | Primary        | 2                | Primary    |
| 15         | 6             | Primary        | 10               | NACT       |
| 16         | 8             | NACT           | 8                | NACT       |
| 17         | 10            | NACT           | 12               | NACT       |
| 18         | 4             | Primary        | 0                | Primary    |
| 19         | 8             | NACT           | 12               | NACT       |
| 20         | 2             | Primary        | 10               | NACT       |

Surgeon 10 percentage agreement: 65%; Surgeon 10 projected futile laparotomy rate: 30%

**Table 5k. Surgeon 11 Scoring Data**

| Patient ID | Surgeon Score | Surgeon Triage | Actual Lap Score | Lap Triage |
|------------|---------------|----------------|------------------|------------|
| 1          | 6             | Primary        | 6                | NACT       |
| 2          | 2             | Primary        | 14               | NACT       |
| 3          | 10            | NACT           | 6                | NACT       |
| 4          | 4             | Primary        | 10               | NACT       |
| 5          | 6             | Primary        | 2                | Primary    |
| 6          | 4             | Primary        | 14               | NACT       |
| 7          | 2             | Primary        | 10               | NACT       |
| 8          | 4             | Primary        | 8                | NACT       |
| 9          | 6             | Primary        | 4                | Primary    |
| 10         | 8             | NACT           | 8                | NACT       |
| 11         | 8             | NACT           | 10               | NACT       |
| 12         | 4             | Primary        | 4                | Primary    |
| 13         | 10            | NACT           | 14               | NACT       |
| 14         | 6             | Primary        | 2                | Primary    |
| 15         | 12            | NACT           | 10               | NACT       |

|    |    |         |    |         |
|----|----|---------|----|---------|
| 16 | 6  | Primary | 8  | NACT    |
| 17 | 12 | NACT    | 12 | NACT    |
| 18 | 0  | Primary | 0  | Primary |
| 19 | 6  | Primary | 12 | NACT    |
| 20 | 8  | NACT    | 10 | NACT    |

Surgeon 11 percentage agreement: 60%; Surgeon 11 projected futile laparotomy rate: 40%

**Table 5l. Surgeon 12 Scoring Data**

| Patient ID | Surgeon Score | Surgeon Triage | Actual Lap Score | Lap Triage |
|------------|---------------|----------------|------------------|------------|
| 1          | 2             | Primary        | 6                | NACT       |
| 2          | 2             | Primary        | 14               | NACT       |
| 3          | 4             | Primary        | 6                | NACT       |
| 4          | 2             | Primary        | 10               | NACT       |
| 5          | 8             | NACT           | 2                | Primary    |
| 6          | 6             | Primary        | 14               | NACT       |
| 7          | 10            | NACT           | 10               | NACT       |
| 8          | 0             | Primary        | 8                | NACT       |
| 9          | 2             | Primary        | 4                | Primary    |
| 10         | 8             | NACT           | 8                | NACT       |
| 11         | 2             | Primary        | 10               | NACT       |
| 12         | 0             | Primary        | 4                | Primary    |
| 13         | 2             | Primary        | 14               | NACT       |
| 14         | 8             | NACT           | 2                | Primary    |
| 15         | 6             | Primary        | 10               | NACT       |
| 16         | 8             | NACT           | 8                | NACT       |
| 17         | 0             | Primary        | 12               | NACT       |
| 18         | 4             | Primary        | 0                | Primary    |
| 19         | 4             | Primary        | 12               | NACT       |
| 20         | 12            | NACT           | 10               | NACT       |

Surgeon 12 percentage agreement: 35%; Surgeon 12 projected futile laparotomy rate: 55%

**Table 5m. Surgeon 13 Scoring Data**

| Patient ID | Surgeon Score | Surgeon Triage | Actual Lap Score | Lap Triage |
|------------|---------------|----------------|------------------|------------|
| 1          | 2             | Primary        | 6                | NACT       |
| 2          | 6             | Primary        | 14               | NACT       |
| 3          | 8             | NACT           | 6                | NACT       |
| 4          | 4             | Primary        | 10               | NACT       |
| 5          | 8             | NACT           | 2                | Primary    |
| 6          | 2             | Primary        | 14               | NACT       |
| 7          | 4             | Primary        | 10               | NACT       |
| 8          | 6             | Primary        | 8                | NACT       |
| 9          | 4             | Primary        | 4                | Primary    |
| 10         | 4             | Primary        | 8                | NACT       |
| 11         | 2             | Primary        | 10               | NACT       |
| 12         | 2             | Primary        | 4                | Primary    |
| 13         | 6             | Primary        | 14               | NACT       |
| 14         | 4             | Primary        | 2                | Primary    |
| 15         | 12            | NACT           | 10               | NACT       |
| 16         | 6             | Primary        | 8                | NACT       |
| 17         | 12            | NACT           | 12               | NACT       |
| 18         | 0             | Primary        | 0                | Primary    |

|    |   |         |    |      |
|----|---|---------|----|------|
| 19 | 2 | Primary | 12 | NACT |
| 20 | 8 | NACT    | 10 | NACT |

Surgeon 13 percentage agreement: 40%; Surgeon 13 projected futile laparotomy rate: 55%

**Table 5n. Surgeon 14 Scoring Data**

| Patient ID | Surgeon Score | Surgeon Triage | Actual Lap Score | Lap Triage |
|------------|---------------|----------------|------------------|------------|
| 1          | 0             | Primary        | 6                | NACT       |
| 2          | 2             | Primary        | 14               | NACT       |
| 3          | 2             | Primary        | 6                | NACT       |
| 4          | 8             | NACT           | 10               | NACT       |
| 5          | 2             | Primary        | 2                | Primary    |
| 6          | 2             | Primary        | 14               | NACT       |
| 7          | 4             | Primary        | 10               | NACT       |
| 8          | 10            | NACT           | 8                | NACT       |
| 9          | 6             | Primary        | 4                | Primary    |
| 10         | 6             | Primary        | 8                | NACT       |
| 11         | 8             | NACT           | 10               | NACT       |
| 12         | 2             | Primary        | 4                | Primary    |
| 13         | 6             | Primary        | 14               | NACT       |
| 14         | 0             | Primary        | 2                | Primary    |
| 15         | 10            | NACT           | 10               | NACT       |
| 16         | 6             | Primary        | 8                | NACT       |
| 17         | 8             | NACT           | 12               | NACT       |
| 18         | 0             | Primary        | 0                | Primary    |
| 19         | 6             | Primary        | 12               | NACT       |
| 20         | 4             | Primary        | 10               | NACT       |

Surgeon 14 percentage agreement: 50%; Surgeon 14 projected futile laparotomy rate: 50%

**Figure 1. Scatterplot of scores by each disease site subscale**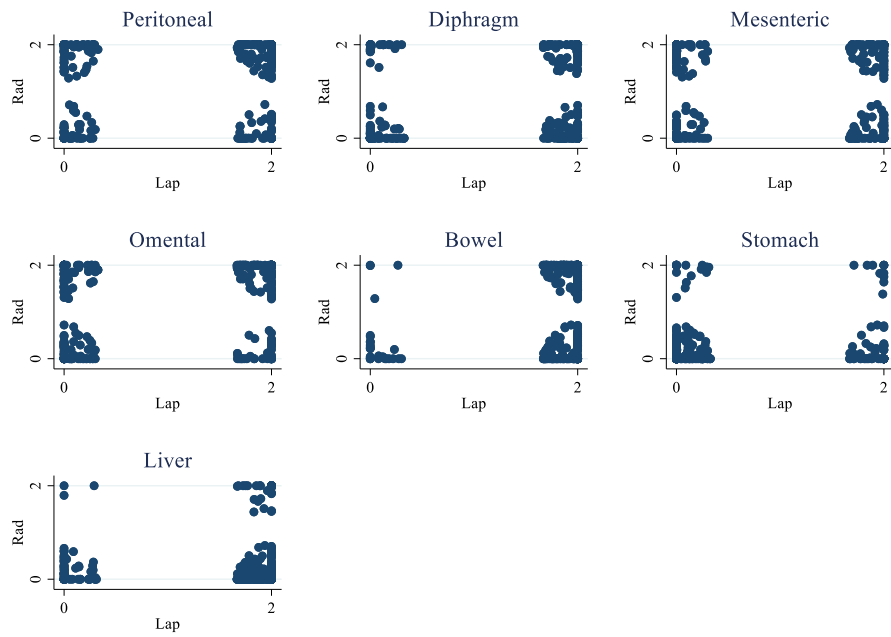

Supplement: ijgc-2020-001718supp001_data_supplement.pdf [file ijgc-2020-001718supp001_data_supplement.pdf]
